# Supplementary material for: Effects of spontaneous nitrogen incorporation by a 4H-SiC(0001) surface caused by plasma nitridation
Source: Royal Society of Chemistry journal article supplement (doi:10.1039/c5tc00076a), 2015-01-01
Supplement: c5tc00076a1.pdf [file c5tc00076a1.pdf]

## SUPPORTING INFORMATION

### **Effects of spontaneous nitrogen incorporation by a 4H-SiC(0001) surface caused by Plasma Nitridation**

Dae-Kyoung Kim <sup>1</sup>, Yu-Seon Kang <sup>1</sup>, Kwang-Sik Jeong <sup>1</sup>, Hang-Kyu Kang <sup>1</sup>, Sang Wan Cho <sup>2</sup>, Kwun-Bum  
Chung <sup>3</sup>, Hyounsub Kim <sup>4</sup>, and Mann-Ho Cho <sup>1,\*</sup>

*<sup>1</sup>Institute of Physics and Applied Physics, Yonsei University, Seoul 120-749, Korea*

*<sup>2</sup>Department of Physics, Yonsei University, 1 Yonseidae-gil, Wonju-si, Gangwon-do 220-710, Republic of Korea*

*<sup>3</sup>Division of Physics and Semiconductor Science, Dongguk University, Seoul, 100-715, Korea*

*<sup>4</sup>School Department of Material Science and Engineering, Sungkyunkwan University, Suwon440-746, Korea*

\*Electronic mail address: [mh.cho@yonsei.ac.kr](mailto:mh.cho@yonsei.ac.kr) (Mann-Ho Cho).

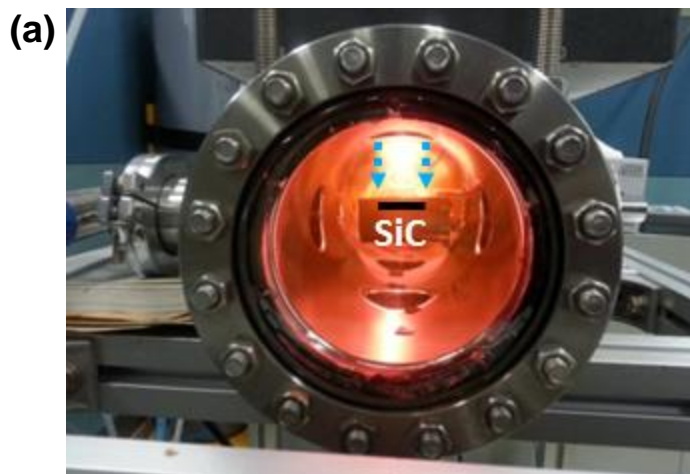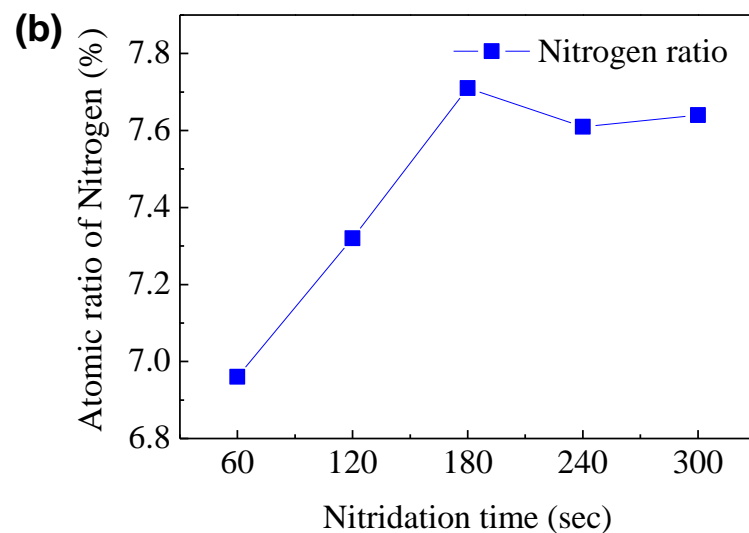

**Figure S1.** (a) image of Plasma Nitridation (PN) process, Nitridation was performed at room temperature for 180 s under a 1000 sccm  $N_2$  gas (ignition Ar, 10 s, working pressure 1 Torr) and plasma power 4100 – 4300 W, (b) Nitrogen ratio as a function of nitridation time, nitrogen saturation time calibrated by XPS (at 180 s).

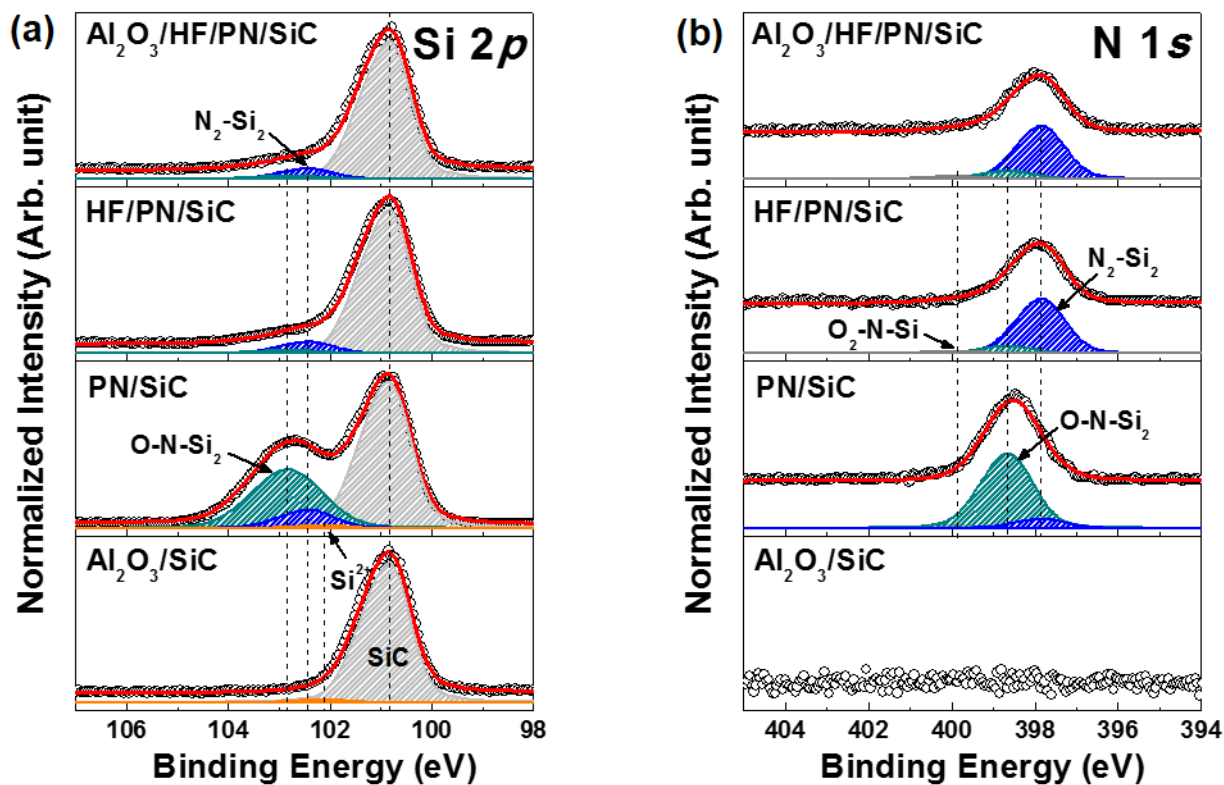

**Figure S2.** (a) XPS Si 2*p* and (b) N 1*s* core-level spectra  $\text{Al}_2\text{O}_3(2\text{ nm})/\text{SiC}$ ,  $\text{PN}/\text{SiC}$ ,  $\text{HF}/\text{PN}/\text{SiC}$  and  $\text{Al}_2\text{O}_3(2\text{ nm})/\text{HF}/\text{PN}/\text{SiC}$ . In the Si 2*p* and N 1*s* spectra, The spectra show that a significant amount of nitrogen atoms remains ( $\text{Si-N}$ ,  $\text{Si-O-N}$  perfect bonds) in the  $\text{Al}_2\text{O}_3(2\text{ nm})/\text{HF}/\text{PN}/\text{SiC}$  after the unstable oxide is removed by a selective etching process using HF.

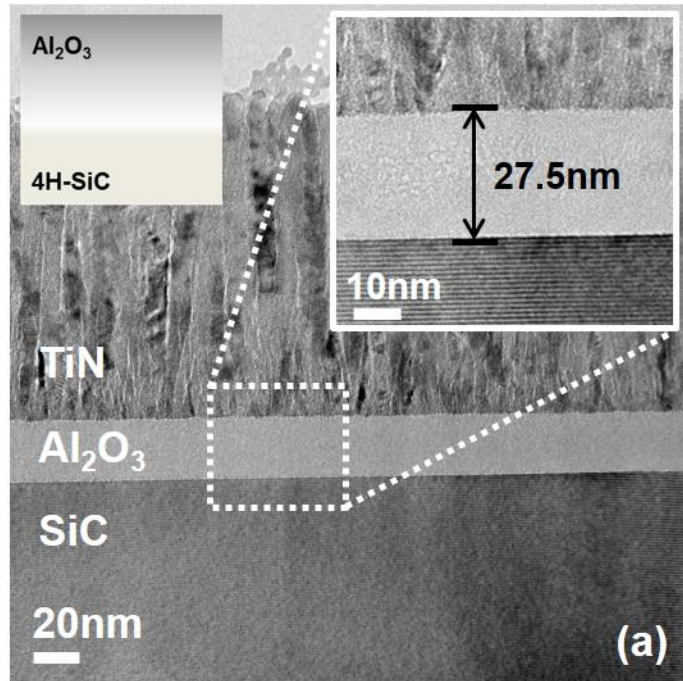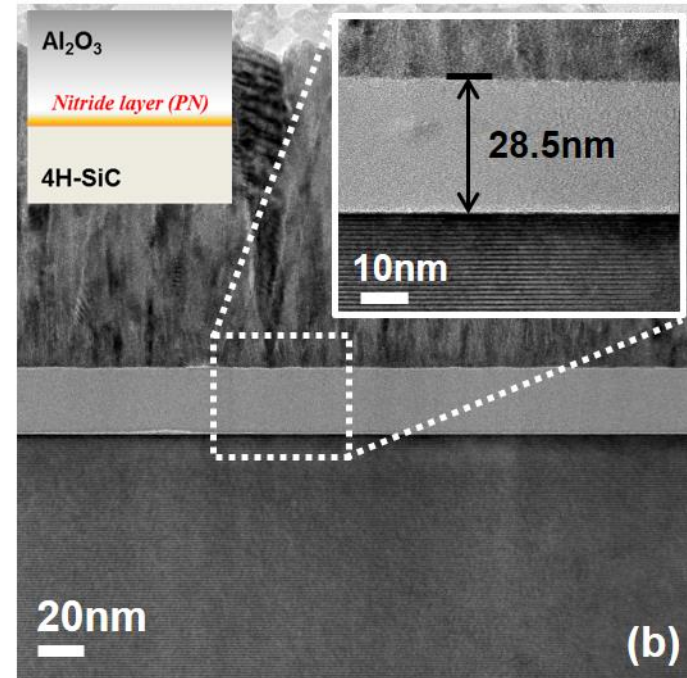

**Figure S3.** Cross-sectional HRTEM images of the (a) Al<sub>2</sub>O<sub>3</sub>/SiC and the (b) Al<sub>2</sub>O<sub>3</sub>/PN/SiC substrate after ALD-Al<sub>2</sub>O<sub>3</sub> (30 nm) and TiN metal gate deposition. The J-E curve of electric field (MV/cm) was calculated by the thickness of dielectric layers and gate voltage ( $V_g$ ).

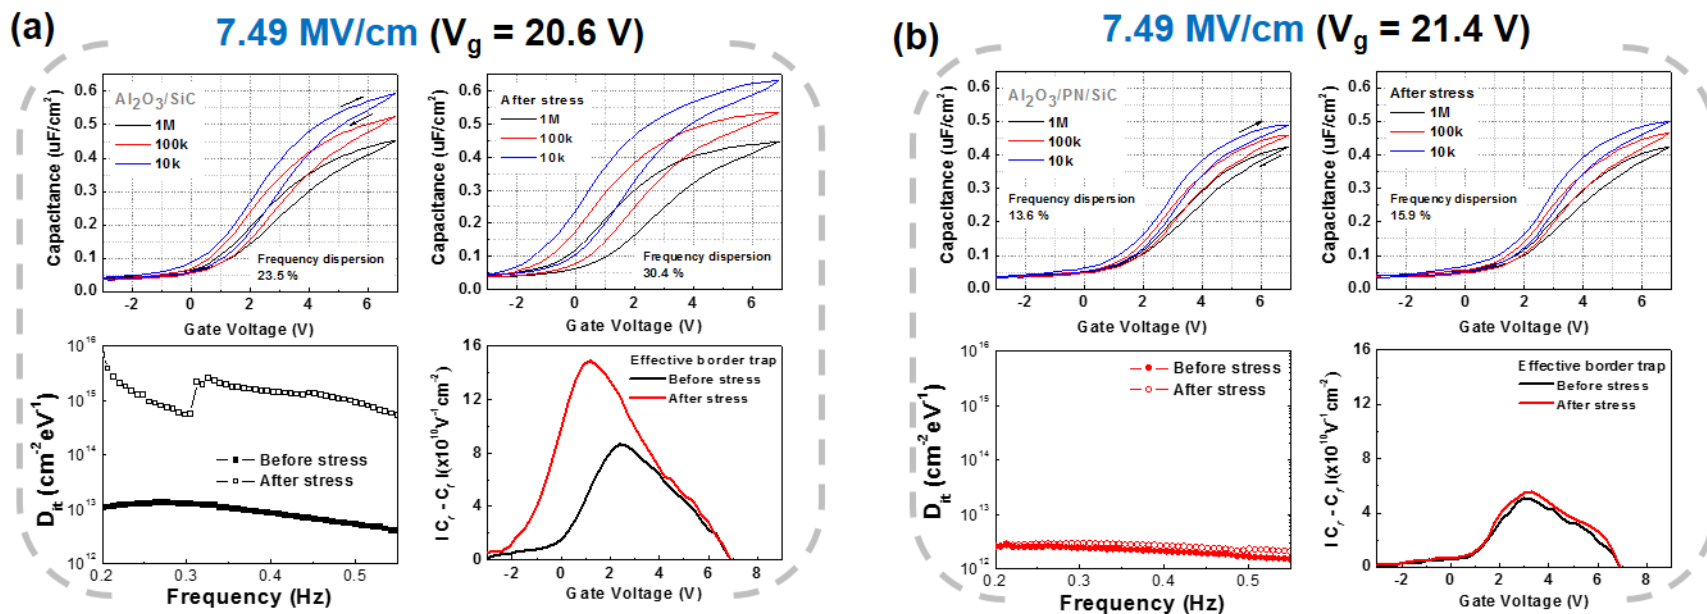

**Figure S4.** The stress field (MV/cm) and gate voltage ( $V_g$ ) were calibrated by dielectric thickness (figure S3), (a)  $Al_2O_3/SiC$  ( $7.49 \text{ MV/cm}$ ,  $V_g = 20.6 \text{ V}$ ) and (b)  $Al_2O_3/PN/SiC$  ( $7.49 \text{ MV/cm}$ ,  $V_g = 21.4 \text{ V}$ ), respectively. The results of defect states (frequency dispersion,  $D_{it}$  and border trap density) was significantly suppressed in  $Al_2O_3/PN/SiC$  by the PN treatment of SiC at the same electric field ( $7.49 \text{ MV/cm}$ ).
